# Supplementary material
Source: PubMed Central journal article supplement (PMC5735761)
Supplement: supplementary_material.pdf [file supplementary_material.pdf]

### Appendix 1: Pharmacy Burnout Survey

| Question                                                                                  | Categorical Responses                                                                                                                                            |
|-------------------------------------------------------------------------------------------|------------------------------------------------------------------------------------------------------------------------------------------------------------------|
| What year were you born?                                                                  | None                                                                                                                                                             |
| What is your gender?                                                                      | Male<br>Female                                                                                                                                                   |
| What is your current relationship status?                                                 | Single, never married<br>Married without children<br>Married with children<br>Divorced<br>Separated<br>Widowed<br>Living with partner                            |
| Have you ever been divorced during your career as a pharmacist?                           | Yes<br>No                                                                                                                                                        |
| Do you have children?                                                                     | Yes<br>No                                                                                                                                                        |
| Please select the term that best represents how you are employed in your current position | Full Time<br>Part Time<br>Supplemental or PRN (as needed)                                                                                                        |
| What is your primary practice setting?                                                    | University Hospital<br>Community Teaching Hospital<br>Community / Non-teaching hospital<br>VA / US Government Hospital<br>City / County Hospital<br>Other (list) |

|                                                                                           |                                                                                                                                                                                                                                                                                                                                                                                                                        |
|-------------------------------------------------------------------------------------------|------------------------------------------------------------------------------------------------------------------------------------------------------------------------------------------------------------------------------------------------------------------------------------------------------------------------------------------------------------------------------------------------------------------------|
| How many years have you been in practice?                                                 | None                                                                                                                                                                                                                                                                                                                                                                                                                   |
| How many years of residency/fellowship training have you completed?                       | None                                                                                                                                                                                                                                                                                                                                                                                                                   |
| Did you complete specialty training in any of the following specialty areas? <sup>a</sup> | Ambulatory Care<br>Drug Information<br>Cardiology<br>Geriatrics<br>Critical Care<br>Health-system pharmacy administration<br>Infectious Disease<br>Medication Safety / Use Policy<br>Informatics<br>Managed care pharmacy<br>Nuclear Pharmacy<br>Nutrition Support<br>Oncology<br>Pediatrics<br>Solid Organ Transplant<br>Psychiatry<br>Emergency Medicine<br>HIV pharmacotherapy<br>Pain and Palliative Care<br>Other |
| On average, how many hours do you work per week?                                          | None                                                                                                                                                                                                                                                                                                                                                                                                                   |
| Which of the following best describes the payment structure of your current position      | Salary rate regardless of hours worked<br>Hourly rate based upon hours worked                                                                                                                                                                                                                                                                                                                                          |
| Are you eligible to receive overtime pay?                                                 | Yes<br>No                                                                                                                                                                                                                                                                                                                                                                                                              |
| On average, how many weekends do you work per year?                                       | None                                                                                                                                                                                                                                                                                                                                                                                                                   |
| On average, how many days of on-call do you participate in monthly?                       | None                                                                                                                                                                                                                                                                                                                                                                                                                   |
| Does your current position involve participation in the following activities              | Order verification<br>Daily rounding<br>Pharmacy Committee Participation<br>Medical Staff Committee Participation<br>Resident Precepting<br>Student Precepting<br>Directing/Coordinating a resident program<br>Research / Publication<br>Medication reconciliation<br>Formal pharmacy consultation (excluding nutrition)<br>Nutrition support consultation<br>Didactic lecturing                                       |

|                                                                                                                                                                                                                                                                                                                |                                                                                                                                                                                                                                                                                                                                                                                                                        |
|----------------------------------------------------------------------------------------------------------------------------------------------------------------------------------------------------------------------------------------------------------------------------------------------------------------|------------------------------------------------------------------------------------------------------------------------------------------------------------------------------------------------------------------------------------------------------------------------------------------------------------------------------------------------------------------------------------------------------------------------|
| What is your current primary area of practice? <sup>a</sup>                                                                                                                                                                                                                                                    | Ambulatory Care<br>Drug Information<br>Cardiology<br>Geriatrics<br>Critical Care<br>Health-system pharmacy administration<br>Infectious Disease<br>Medication Safety / Use Policy<br>Informatics<br>Managed care pharmacy<br>Nuclear Pharmacy<br>Nutrition Support<br>Oncology<br>Pediatrics<br>Solid Organ Transplant<br>Psychiatry<br>Emergency Medicine<br>HIV pharmacotherapy<br>Pain and Palliative Care<br>Other |
| Are you certified by the board of pharmacy specialties?                                                                                                                                                                                                                                                        | Yes (list certification)<br>No                                                                                                                                                                                                                                                                                                                                                                                         |
| Are you recognized as a fellow by any professional organizations?                                                                                                                                                                                                                                              | Yes<br>No                                                                                                                                                                                                                                                                                                                                                                                                              |
| <sup>a</sup> Internal medicine pharmacy practice was inadvertently left off as a choice. Communication was included in the survey invitation for respondents to list this area in the “Other” section, with answers then split out due to the large number of respondents training or practicing in this area. |                                                                                                                                                                                                                                                                                                                                                                                                                        |

| Section 2 - Professional Stressors                                                                                                                                                             |                                                                                                |                                                                                       |
|------------------------------------------------------------------------------------------------------------------------------------------------------------------------------------------------|------------------------------------------------------------------------------------------------|---------------------------------------------------------------------------------------|
| Question                                                                                                                                                                                       | To what extent have the following factors affected you professionally over the last 12 months? |                                                                                       |
| Factors                                                                                                                                                                                        | Too many hours at work                                                                         | Too much downtime at work                                                             |
|                                                                                                                                                                                                | Too much call                                                                                  | Inadequate office space                                                               |
|                                                                                                                                                                                                | Inadequate research time                                                                       | Too little vacation time                                                              |
|                                                                                                                                                                                                | Inadequate administrative time                                                                 | Medication related errors                                                             |
|                                                                                                                                                                                                | Inadequate teaching time                                                                       | Too many non-clinical responsibilities                                                |
|                                                                                                                                                                                                | Too many students                                                                              | Difficult non-pharmacist colleagues                                                   |
|                                                                                                                                                                                                | Too many residents                                                                             | Difficult pharmacist colleagues                                                       |
|                                                                                                                                                                                                | Low salary                                                                                     | Contributions are under-appreciated by other members of the healthcare team           |
|                                                                                                                                                                                                | Hostile work environment                                                                       | Too much focus on cost                                                                |
|                                                                                                                                                                                                | Uncertainty of healthcare reform's impact on my job                                            | Significant other / spouse not understanding the time commitment that my job requires |
| Answers <sup>a</sup>                                                                                                                                                                           | Large Amount                                                                                   | Small Amount                                                                          |
|                                                                                                                                                                                                | Moderate Amount                                                                                | None                                                                                  |
| <sup>a</sup> Respondents selecting "large amount" or "moderate amount" were classified on a dichotomous scale as having the factor of interest (yes) for the purposes of statistical analysis. |                                                                                                |                                                                                       |

| Section 3 - Professional Satisfaction                                                                                                                                                               |                                                                                                                     |                                     |
|-----------------------------------------------------------------------------------------------------------------------------------------------------------------------------------------------------|---------------------------------------------------------------------------------------------------------------------|-------------------------------------|
| Question                                                                                                                                                                                            | In relation to your current position as a clinical pharmacist, how satisfied are you with the factors listed below? |                                     |
| Factors                                                                                                                                                                                             | Overall career                                                                                                      | My pharmacist colleagues            |
|                                                                                                                                                                                                     | Balance between professional and personal life                                                                      | My physician and nursing colleagues |
|                                                                                                                                                                                                     | Time for professional growth                                                                                        | My salary / income                  |
|                                                                                                                                                                                                     | Intellectual challenge of work                                                                                      |                                     |
| Answers <sup>a</sup>                                                                                                                                                                                | Very satisfied (1)                                                                                                  | Somewhat dissatisfied (4)           |
|                                                                                                                                                                                                     | Somewhat satisfied (2)                                                                                              | Very dissatisfied (5)               |
|                                                                                                                                                                                                     | Neutral (3)                                                                                                         |                                     |
| <sup>a</sup> Respondents selecting "very satisfied" or "somewhat satisfied" were classified on a dichotomous scale as having the factor of interest (yes) for the purposes of statistical analysis. |                                                                                                                     |                                     |

| Section 4 – Maslach Burnout Inventory <sup>a</sup>                                                                                                                                           |                                                                       |                  |
|----------------------------------------------------------------------------------------------------------------------------------------------------------------------------------------------|-----------------------------------------------------------------------|------------------|
| Question                                                                                                                                                                                     | How often do you experience the following?                            |                  |
| Factors                                                                                                                                                                                      | I feel emotionally drained from my work                               |                  |
|                                                                                                                                                                                              | I feel used up at the end of the day                                  |                  |
|                                                                                                                                                                                              | I feel fatigued when I get up in the morning to face another work day |                  |
| Answers                                                                                                                                                                                      | Daily                                                                 | Monthly          |
|                                                                                                                                                                                              | Few times a week                                                      | Few times a year |
|                                                                                                                                                                                              | Weekly                                                                | Never            |
|                                                                                                                                                                                              | Few times a month                                                     |                  |
| <sup>a</sup> Sample of first 3 questions; the inventory consists of 22 questions total and was used with permission from Mind Garden, Inc. The full MBI can be obtained by Mind Garden, Inc. |                                                                       |                  |

| Section 5 – Career Outlook                                                                                                                                                               |                                                               |                   |
|------------------------------------------------------------------------------------------------------------------------------------------------------------------------------------------|---------------------------------------------------------------|-------------------|
| Questions                                                                                                                                                                                | How likely do you feel your professional career will improve? |                   |
|                                                                                                                                                                                          | How likely do you feel your professional career will worsen?  |                   |
| Answers <sup>a</sup>                                                                                                                                                                     | Likely                                                        | Somewhat unlikely |
|                                                                                                                                                                                          | Somewhat Likely                                               | Unlikely          |
|                                                                                                                                                                                          | Not Sure                                                      |                   |
| <sup>a</sup> Respondents selecting “likely” or “somewhat likely” were classified on a dichotomous scale as having the factor of interest (yes) for the purposes of statistical analysis. |                                                               |                   |

| <b>Supplemental Table 1: Characteristics of 974 Survey Respondents</b> |              |
|------------------------------------------------------------------------|--------------|
| Characteristics                                                        | Result       |
| Age (years)                                                            | 35 [31 – 41] |
| Female gender, n (%)                                                   | 677 (69.5)   |
| Marital Status, n (%)                                                  |              |
| Single                                                                 | 311 (31.9)   |
| Married / stable partner                                               | 663 (68.1)   |
| Ever divorced                                                          | 67 (6.9)     |
| Children, n (%)                                                        | 419 (43.0)   |
| Employment status, n (%)                                               |              |
| Full-time                                                              | 949 (97.4)   |
| Part-time                                                              | 25 (2.6)     |
| Primary practice setting, n (%)                                        |              |
| University hospital                                                    | 457 (46.9)   |
| Academic community hospital                                            | 300 (30.8)   |
| Non-academic community hospital                                        | 174 (17.9)   |
| Other                                                                  | 25 (2.6)     |
| Government / veterans hospital                                         | 18 (1.8)     |
| Practice duration (years)                                              | 8 [4.5 – 15] |
| Workload characteristics                                               |              |
| Hours worked per week                                                  | 48 [40 – 50] |
| Average weekends worked annually                                       | 9 [0 – 15]   |

|                                                       |            |
|-------------------------------------------------------|------------|
| Average days on call monthly                          | 0 [0 – 3]  |
| Payment structure, n (%)                              |            |
| Salaried employee                                     | 774 (79.5) |
| Eligible to receive overtime pay                      | 236 (24.2) |
| Certified by the Board of Pharmacy Specialties, n (%) | 711 (73.0) |
| Multiple certifications                               | 99 (10.2)  |
| Fellowship status, n (%)                              | 57 (5.9)   |
| Daily duties, n (%)                                   |            |
| Order verification                                    | 608 (62.4) |
| Daily rounding                                        | 683 (70.1) |
| Pharmacy committee involvement                        | 780 (80.1) |
| Medical staff committee involvement                   | 571 (58.6) |
| Residency precepting                                  | 749 (76.9) |
| Student precepting                                    | 846 (86.9) |
| Residency director                                    | 173 (17.8) |
| Research and publication                              | 542 (55.6) |
| Medication reconciliation                             | 528 (54.2) |
| Formal pharmacist consultation                        | 570 (58.5) |
| Nutrition support consultation                        | 208 (21.4) |
| Didactic lecturing                                    | 428 (43.9) |
| Current practice area, n (%) <sup>a</sup>             |            |
| Critical care                                         | 270 (27.7) |
| Emergency medicine                                    | 124 (12.7) |



|                                                 |            |
|-------------------------------------------------|------------|
| Pediatrics                                      | 112 (11.5) |
| Infectious disease                              | 99 (10.2)  |
| Cardiology                                      | 91 (9.3)   |
| Internal medicine                               | 93 (9.5)   |
| Oncology                                        | 74 (7.6)   |
| Administration                                  | 77 (7.9)   |
| Solid organ transplant                          | 61 (6.3)   |
| Generalist                                      | 39 (4.0)   |
| Other                                           | 38 (3.9)   |
| Surgery                                         | 23 (2.4)   |
| Medication safety / policy                      | 21 (2.2)   |
| Nutrition support                               | 18 (1.8)   |
| Drug information                                | 15 (1.5)   |
| Geriatrics                                      | 14 (1.4)   |
| Informatics                                     | 14 (1.4)   |
| Pain / palliative medicine                      | 10 (1.0)   |
| Completed post-graduate training, n (%)         | 566 (58.1) |
| Duration (years)                                | 1 [1 – 2]  |
| Specialty residency training areas <sup>a</sup> |            |
| Critical care                                   | 179 (18.4) |
| Pediatrics                                      | 69 (7.1)   |
| Infectious disease                              | 54 (5.5)   |
| Other                                           | 45 (4.6)   |

|                                                                                      |          |
|--------------------------------------------------------------------------------------|----------|
| Ambulatory care                                                                      | 37 (3.8) |
| Oncology                                                                             | 38 (3.9) |
| Cardiology                                                                           | 40 (4.1) |
| Solid organ transplant                                                               | 36 (3.7) |
| Emergency medicine                                                                   | 34 (3.5) |
| Internal medicine                                                                    | 25 (2.6) |
| Administration                                                                       | 16 (1.6) |
| Pharmacotherapy                                                                      | 15 (1.5) |
| Drug information / medication safety                                                 | 14 (1.4) |
| Data are presented as median [25% - 75% interquartile range] unless otherwise noted. |          |
| <sup>a</sup> Respondents may have selected multiple areas.                           |          |
